# Supplementary material
Source: PubMed Central journal article supplement (PMC3696813)
Supplement: 1222559110_sapp.pdf [file 1222559110_sapp.pdf]

**Supporting Information** for this manuscript is included in this appendix:

**Supplemental Table 1:** Stable isotopic composition of hominin samples discussed in the text, with additional analytical results.

**Supplemental Table 2:** Stable isotopic composition of non-hominin mammalian fauna discussed in the text.

**Supplemental Photos:** Compilation of before/after photos of hominin specimens analyzed for isotopic composition (analyses HH1-HH19), showing location of subsample taken. Three additional samples from Dikika (analyses HH20-HH22) were sampled at a later date, and equivalent photos are not presented for these specimens.

**Supplemental Table 1**

| Specimen   | Stratigraphy | Sample used                                  | Sample | Mass drilled | Mass analyzed | Yield                | $\delta^{13}\text{C}$ (VPDB) | $\delta^{18}\text{O}$ (VPDB) | Nominal $\%C_4$ |
|------------|--------------|----------------------------------------------|--------|--------------|---------------|----------------------|------------------------------|------------------------------|-----------------|
|            | Submember    |                                              |        | [mg]         | [mg]          | [% $\text{CaCO}_3$ ] | [‰]                          | [‰]                          | [%]             |
| A.L.444-2  | KH2          | M <sub>2/3</sub> fragment                    | HH1    | 1.384        | 0.632         | 4.1                  | -8.0                         | -2.9                         | 16              |
| A.L.440-1  | KH2          | P <sub>4</sub> fragment                      | HH2    | 1.078        | 0.601         | 3.1                  | -7.6                         | -7.3                         | 20              |
| A.L.462-7  | KH2          | M <sub>3</sub>                               | HH3    | 2.029        | 0.404         | 4.9                  | -6.4                         | -0.1                         | 33              |
| A.L.452-18 | KH2          | M fragment                                   | HH4    | 2.033        | 0.694         | 5.1                  | -2.9                         | -2.7                         | 69              |
| A.L.437-2  | KH2          | M <sub>2</sub> fragment                      | HH5    | 1.356        | 0.655         | 3.3                  | -6.6                         | -3.3                         | 31              |
| A.L.438-1h | KH2          | RM <sub>1</sub> fragment                     | HH6    | 1.263        | 0.647         | 4.2                  | -10.2                        | -6.8                         | 0               |
| A.L.309-8  | DD3          | M <sup>1</sup> fragment                      | HH7    | 1.339        | 0.668         | 4.3                  | -6.4                         | -4.6                         | 33              |
| A.L.423-1  | SH2          | M <sup>1</sup> in maxillar fragment          | HH8    | 1.358        | 0.604         | 4.2                  | -7.2                         | -6.7                         | 24              |
| A.L.432-1  | DD3          | M <sub>3</sub> fragment in mandible fragment | HH9    | 1.875        | 0.654         | 5.1                  | -4.3                         | -8.0                         | 55              |
| A.L.699-1* | DD3          | upper P fragment                             | HH10   | 2.001        | 0.696/0.303   | 27.1/9.5             | (-8.2/-6.0)                  | (-4.4/-10.0)                 | -               |
| A.L.333-52 | DD2          | M <sub>1</sub> fragment                      | HH11   | 1.291        | 0.633         | 5.2                  | -8.6                         | -7.1                         | 9               |
| A.L.207-17 | DD2          | lower M <sub>3</sub>                         | HH12   | 1.660        | 0.647         | 4.7                  | -4.3                         | -7.4                         | 55              |
| A.L.411-1  | SH2          | M <sub>2</sub> in mandible fragment          | HH13   | 1.729        | 0.697         | 5.9                  | -7.7                         | 0.5                          | 19              |
| A.L.225-8  | SH1          | M <sub>2</sub> in mandible fragment          | HH14   | 1.709        | 0.697         | 6.6                  | -6.7                         | -2.4                         | 29              |
| A.L.125-11 | SH2          | M <sub>1</sub> in maxillary fragment         | HH15   | 2.000        | 0.662         | 4.0                  | -13.0                        | -8.4                         | 0               |
| A.L.660-1  | SH1          | M <sub>2</sub> fragment                      | HH16   | 2.225        | 0.603         | 4.3                  | -9.6                         | -1.1                         | 0               |
| A.L.249-27 | SH1          | P <sup>3</sup> fragment                      | HH17   | 1.544        | 0.643         | 4.1                  | -10.0                        | -9.5                         | 0               |
| A.L.293-3  | DD3          | I <sup>1</sup>                               | HH18   | 0.405        | 0.290         | 5.2                  | -10.7                        | -9.0                         | 0               |
| DIK2-1     | BM           | M fragment                                   | HH19   | 1.811        | 0.652         | 4.7                  | -4.3                         | -7.8                         | 55              |
| DIK40-1    | SH           | left M <sup>1</sup>                          | HH20   | 0.475        | 0.475         | 7.8                  | -10.6                        | +4.1                         | 0               |
| DIK49-12   | SH           | P                                            | HH21   | 1.411        | 1.411         | 6.1                  | -4.9                         | +5.7                         | 48              |
| DIK90-1**  | SH           | M in mandible                                | HH22   | 0.492        | 0.492         | 16.4                 | (-7.0)                       | (-3.4)                       | 26              |

Notes: \*a first analysis of this specimen (HH10) produced a yield of CO<sub>2</sub> from the reaction of H<sub>3</sub>PO<sub>4</sub> with the sample that indicated the presence of exogenous carbonate (27.1% CaCO<sub>3</sub>). A second analysis was completed with the remainder of the sample, which produced a slightly higher than expected yield (9.5% CaCO<sub>3</sub>). Because of this high fraction of exogenous carbonate, likely precipitated from diagenetic fluids, this specimen is excluded from the statistical calculations in figures in the main text. \*\*This specimen also showed a high yield, and was excluded from the statistical calculations and figures in the main text. Nominal %C<sub>4</sub> was calculated using endmember values of pure C<sub>4</sub> and pure C<sub>3</sub> diets of +1.4 and -10.9‰ (the values of endmember C<sub>4</sub>-grazing and C<sub>3</sub>-browsing taxa *Alcelaphini* and *Giraffa*). Samples HH20 to HH22 were analyzed in a separate sequence of analyses. Two of these were analyzed in a sequence which included relatively poor analytical error on  $\delta^{18}\text{O}$  values of reference materials (average standard deviation ~0.77‰ for these very small samples); analytical error on  $\delta^{13}\text{C}$  values was 0.07‰.

**Supplemental Table 2**

| Specimen ID |     | Taxonomic ID | Stratigraphy<br>Submember | Sample    | $\delta^{13}\text{C}$<br>(VPDB)<br>[‰] | $\delta^{18}\text{O}$<br>(VPDB)<br>[‰] |      |
|-------------|-----|--------------|---------------------------|-----------|----------------------------------------|----------------------------------------|------|
| A.L. 181    | 4   | b            | Alcelaphini               | DD-2      | JW-EN-229                              | 2.6                                    | -1.6 |
| A.L. 115    | 3   |              | Alcelaphini               | DD-2      | JW-EN-230                              | 0.9                                    | -4.4 |
| A.L. 181    | 7   |              | Alcelaphini               | DD-2      | JW-EN-231                              | 1.9                                    | -4.3 |
| A.L. 136    | 6   |              | Alcelaphini               | DD-2      | JW-EN-232                              | 2.2                                    | -1.0 |
| A.L. 114    | 18  |              | Alcelaphini               | DD-2      | JW-EN-233                              | 2.8                                    | -5.8 |
| A.L. 241    | 13  |              | Alcelaphini               | DD-2      | JW-EN-234                              | 0.6                                    | -3.6 |
| A.L. 155    | 37  |              | Alcelaphini               | DD-2      | JW-EN-235                              | 1.8                                    | -4.0 |
| A.L. 167    | 29  |              | Alcelaphini               | DD-2      | JW-EN-236                              | 0.5                                    | -1.7 |
| A.L. 444    | 28  |              | Alcelaphini               | KH-2      | JW-EN-237                              | 0.9                                    | -6.7 |
| A.L. 114    | 17  |              | Alcelaphini               | DD-2      | JW-EN-244                              | 0.8                                    | -4.2 |
| A.L. 133    | 13  |              | Alcelaphini               | DD-2      | JW-EN-228                              | 0.7                                    | -3.2 |
| A.L. 333    | 502 |              | <i>Giraffa</i>            | DD-2      | JW-EN-125                              | -10.3                                  | 3.5  |
| A.L. 200    | 10  |              | <i>Giraffa</i>            | SH-1      | JW-EN-126                              | -11.3                                  | -4.7 |
| A.L. 182    | 68  |              | <i>Giraffa</i>            | DD-2      | KR-EN-94                               | -9.6                                   | -4.5 |
| A.L. 489    | 2   |              | <i>Giraffa</i>            | KH-2      | MS-EN-36                               | -10.7                                  | 3.6  |
| A.L. 1462   | 1   |              | <i>Giraffa</i>            | KH-2      | MS-EN-38                               | -10.9                                  | 3.6  |
| A.L. 207    | 5   | a            | <i>Giraffa</i>            | DD-2      | MS-EN-40                               | -9.1                                   | 3.8  |
| A.L. 125    | 3   | a            | <i>Giraffa</i>            | SH-1/SH-2 | MS-EN-45                               | -10.4                                  | 0.5  |
| A.L. 232    | 1   | b            | <i>Giraffa</i>            | SH-1/SH-2 | MS-EN-46                               | -10.9                                  | -5.0 |
| A.L. 500    | 1   | c            | <i>Giraffa</i>            | KH-2      | MS-EN-1                                | -11.4                                  | -5.5 |
| A.L. 114    | 8   |              | <i>Giraffa</i>            | DD-2      | MS-EN-2                                | -11.4                                  | 1.0  |
| A.L. 439    | 2   |              | <i>Giraffa</i>            | KH-2      | MS-EN-3                                | -10.7                                  | -0.4 |
| A.L. 439    | 2   |              | <i>Giraffa</i>            | KH-2      | MS-EN-4                                | -10.2                                  | 0.8  |
| A.L. 114    | 20  |              | <i>Giraffa</i>            | DD-2      | MS-EN-5                                | -11.5                                  | -6.0 |
| A.L. 115    | 9   |              | <i>Giraffa</i>            | DD-2      | MS-EN-8                                | -12.7                                  | -2.2 |
| A.L. 361    | 5   |              | <i>Giraffa</i>            | KH-2      | MS-EN-9                                | -14.8                                  | -2.4 |

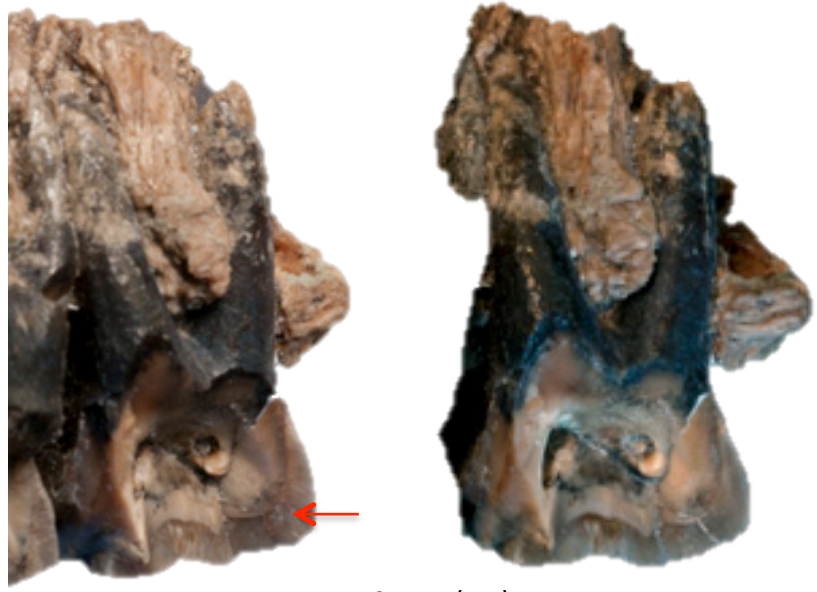

A.L. 125-11 ( $M_1$ )

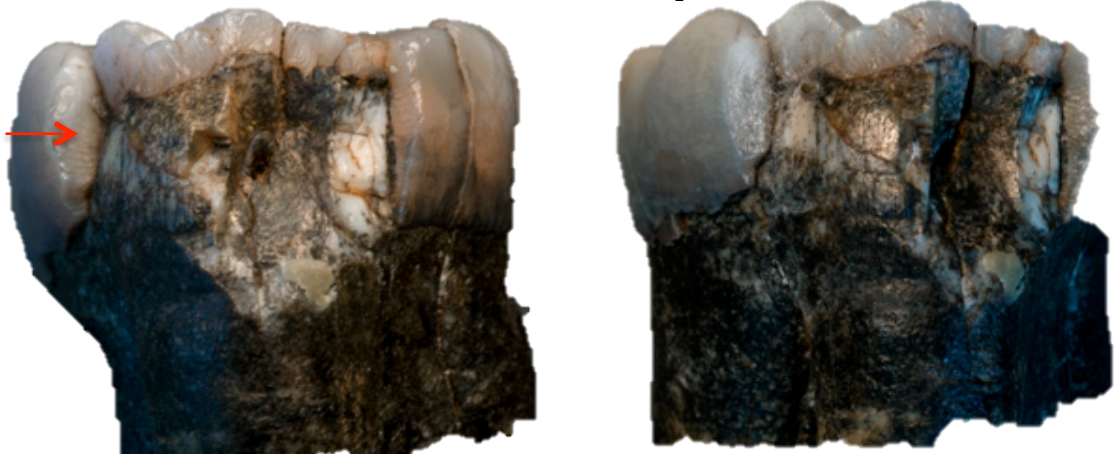

A.L. 207-17 ( $M_3$ )

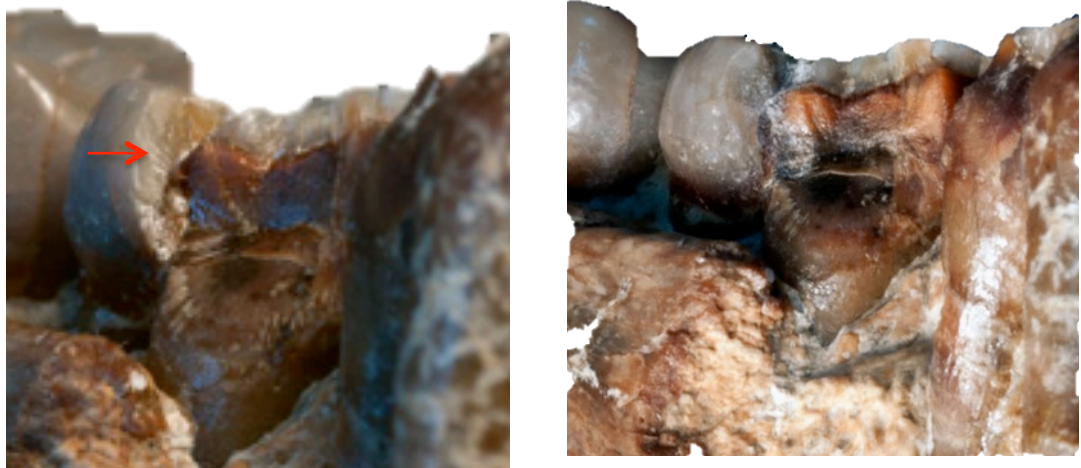

A.L. 225-8 ( $M_2$ )

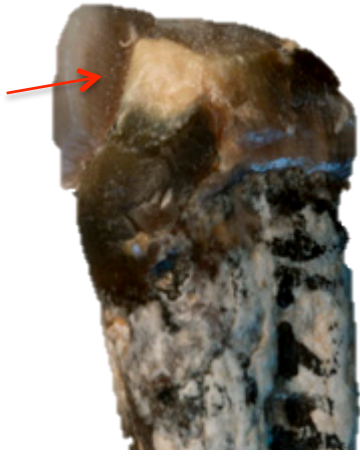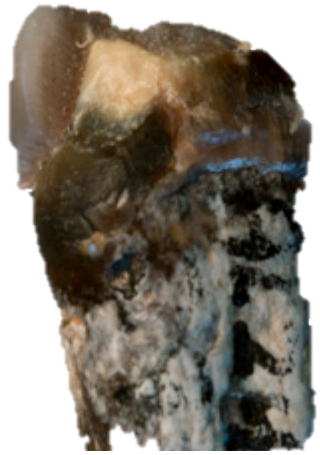

A.L. 249-27 (P<sup>3</sup>)

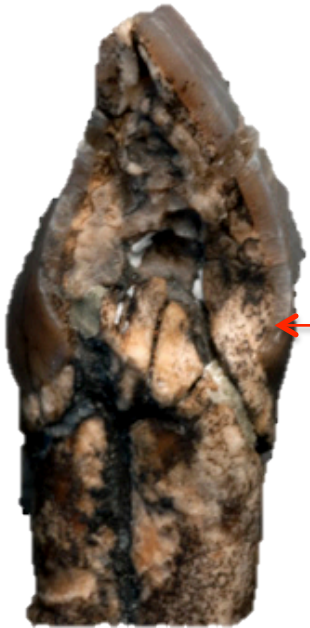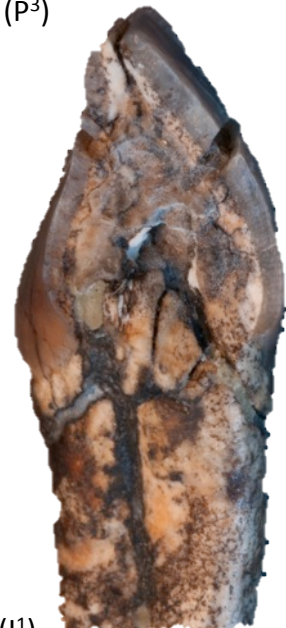

A.L. 293-3 (I<sup>1</sup>)

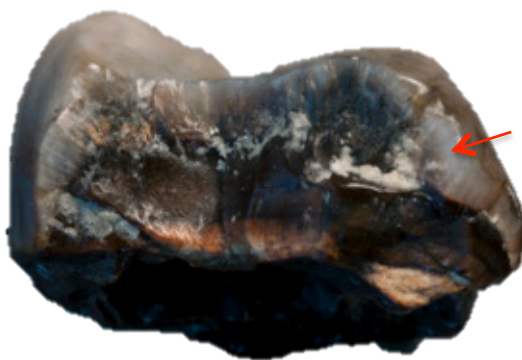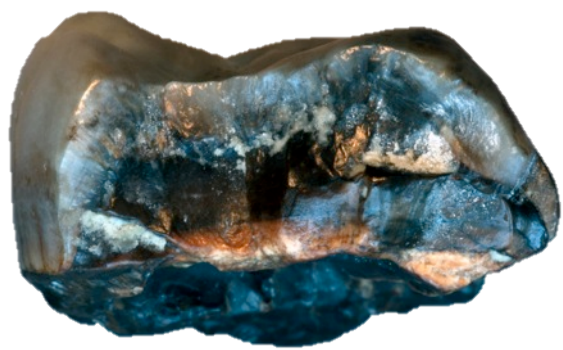

A.L. 309-8 (M<sup>1</sup>)

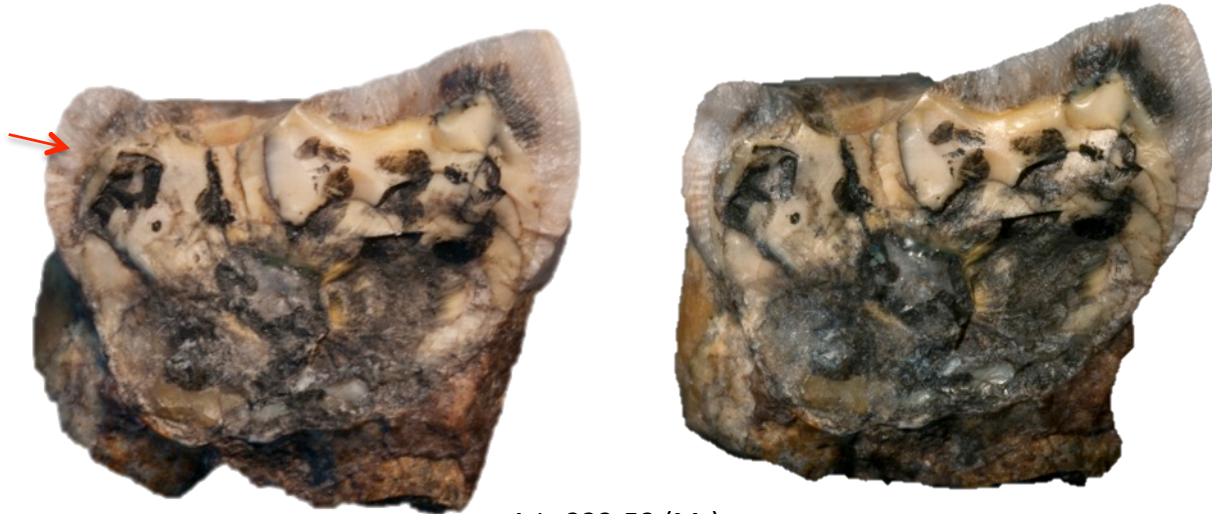

A.L. 333-52 ( $M_1$ )

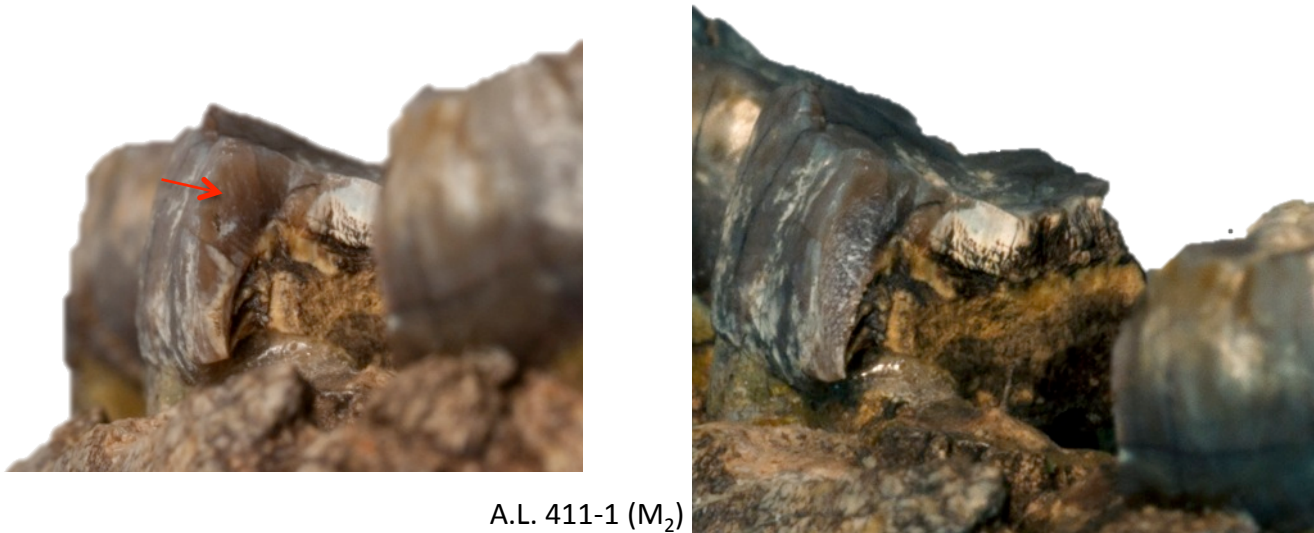

A.L. 411-1 ( $M_2$ )

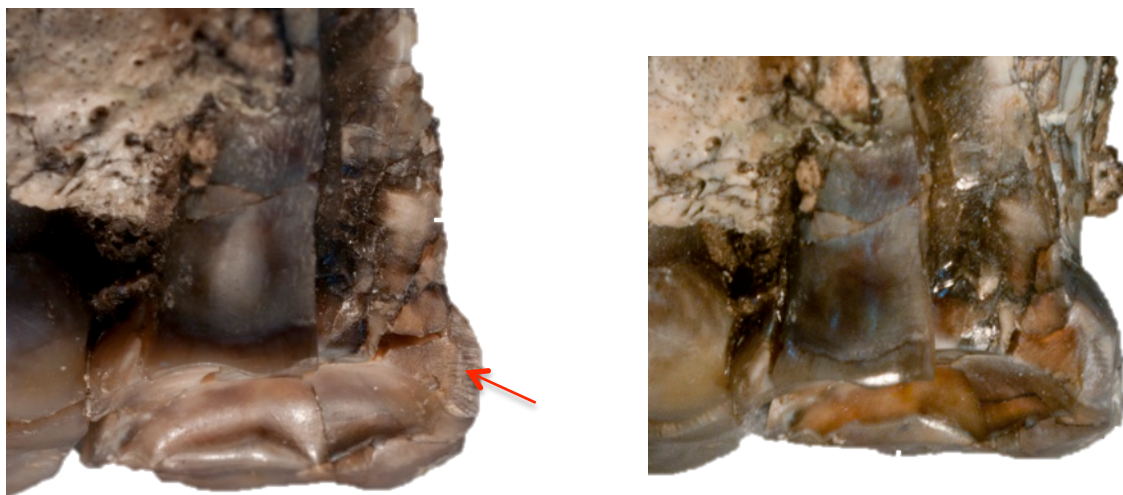

A.L. 423-1 ( $M^1$ )

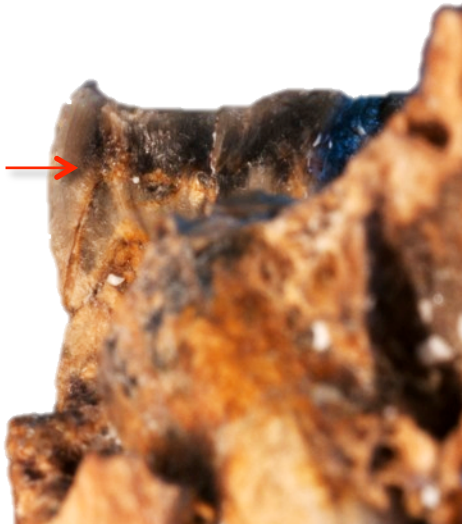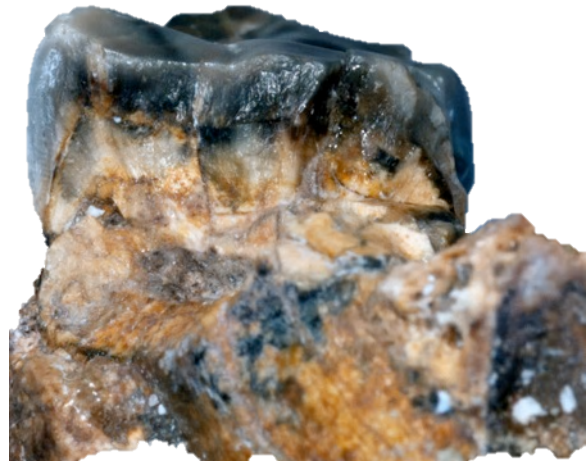

A.L. 432-1 ( $M_3$ )

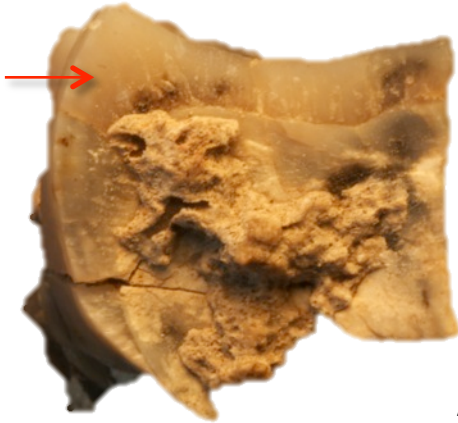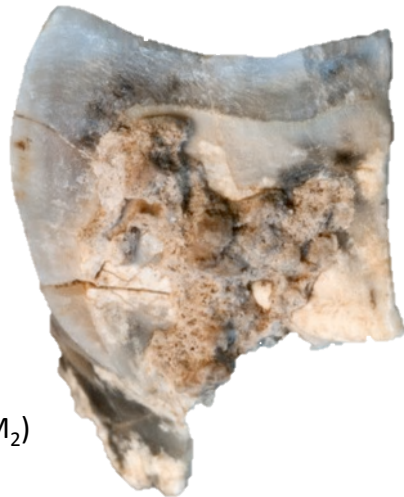

A.L. 437-2 ( $M_2$ )

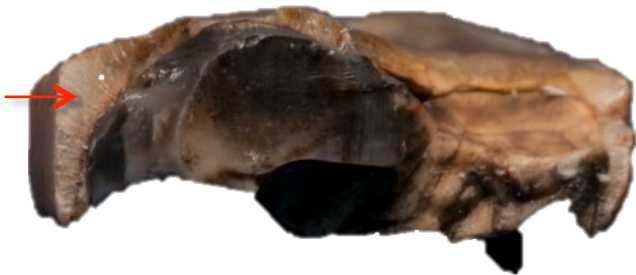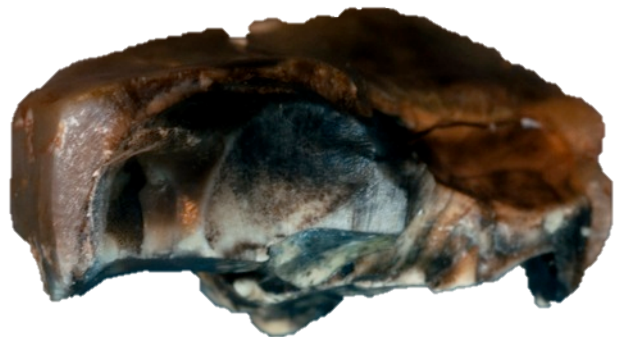

A.L. 438-1h ( $M_1$ )

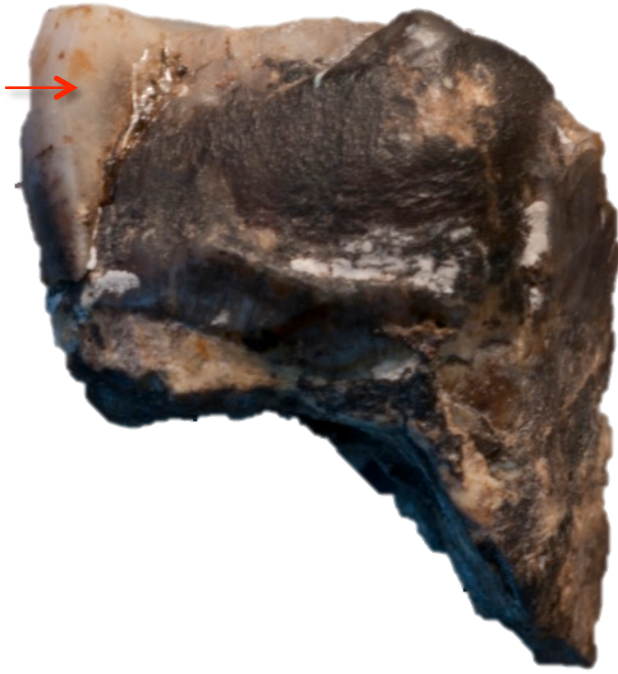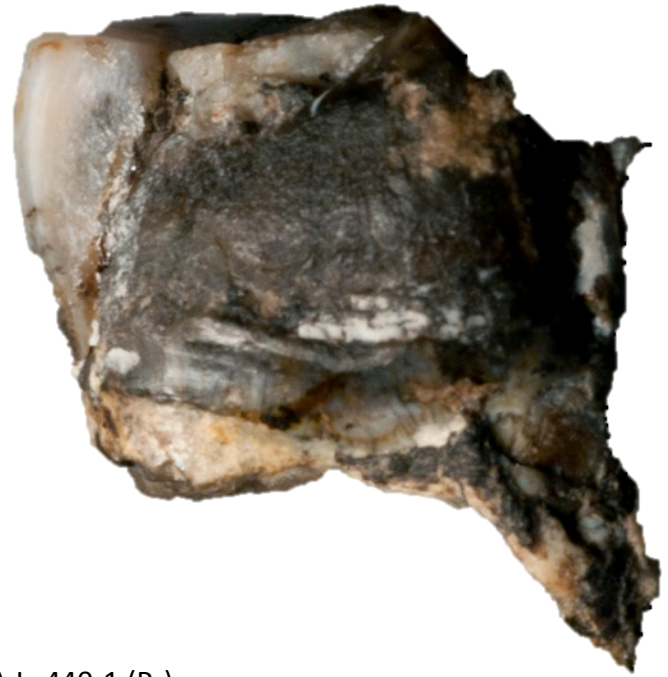

A.L. 440-1 (P<sub>4</sub>)

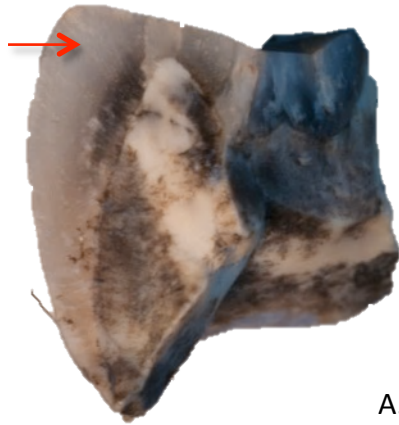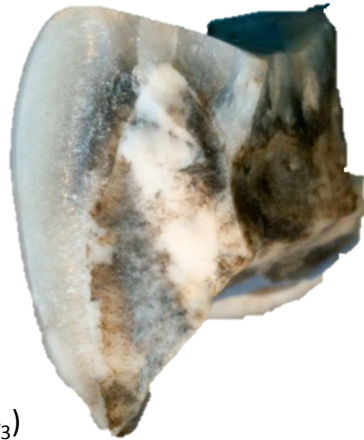

A.L. 444-2 (M<sub>2/3</sub>)

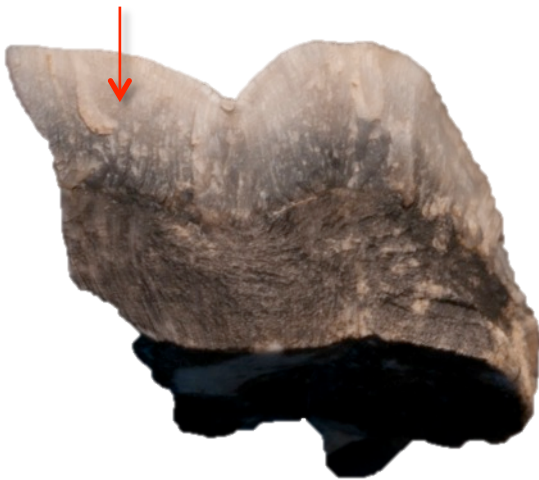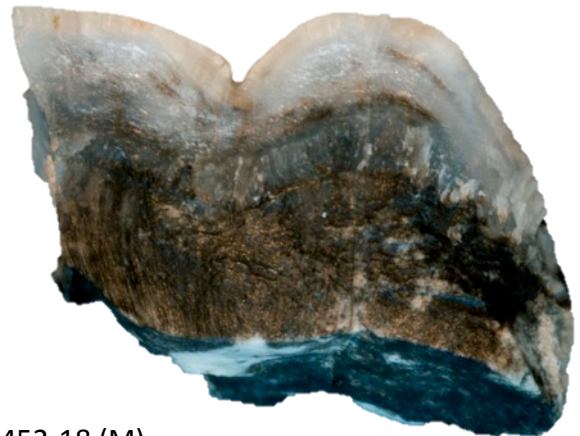

A.L. 452-18 (M)



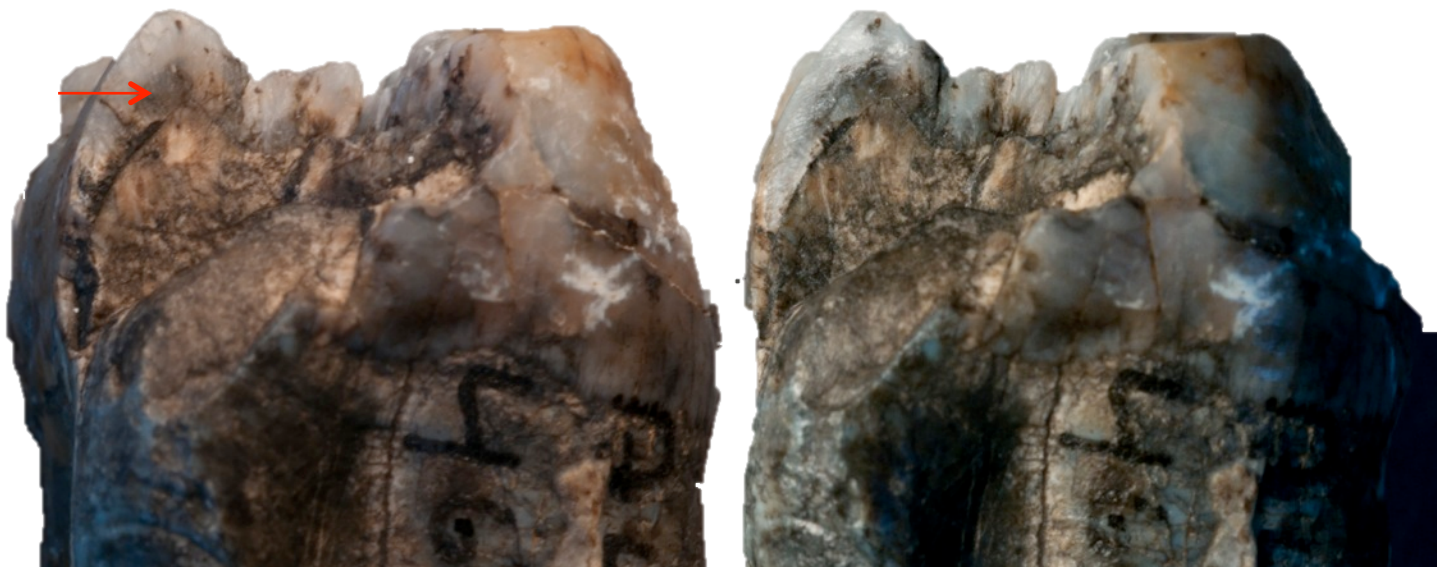

A.L. 462-7 ( $M_3$ )

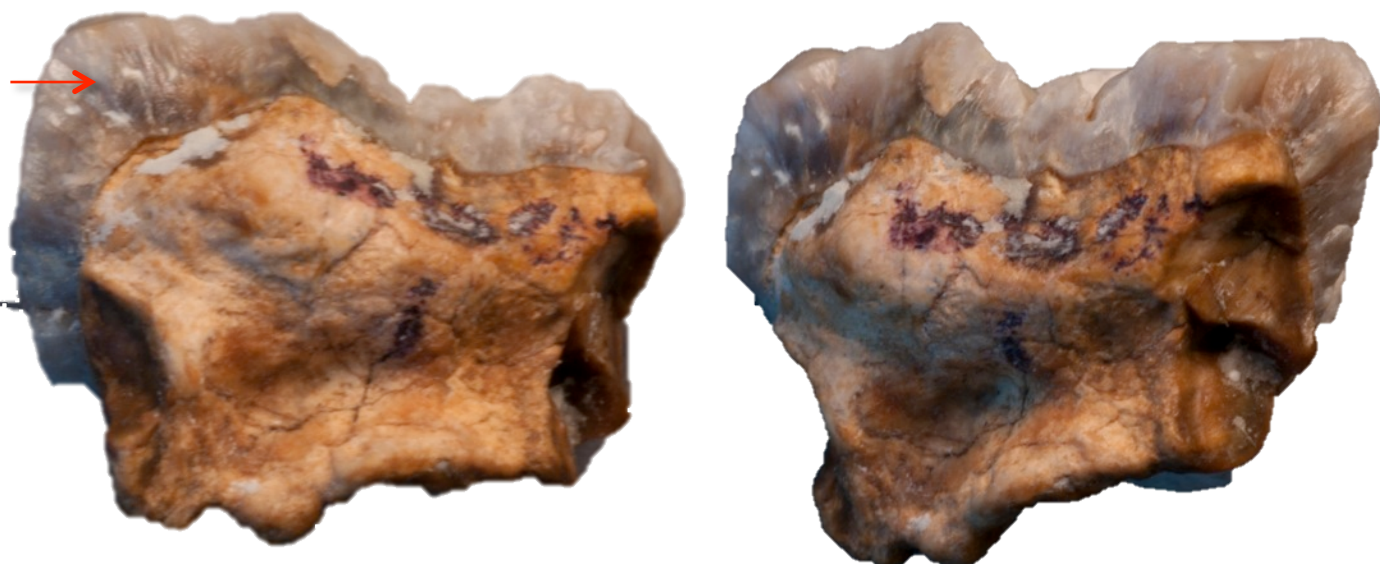

A.L. 660-1 ( $M_2$ )

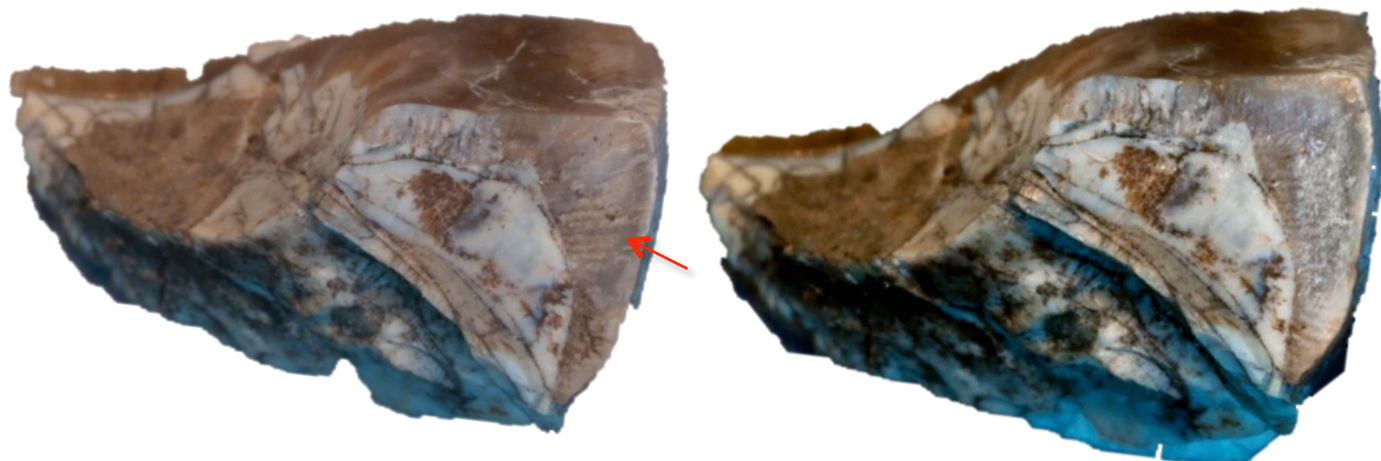

DIK 2-1 (M)
